# Supplementary material
Source: MDPI journal article supplement (https://www.mdpi.com/1996-1073/10/2/182)
Supplement: s1 [file s1]

# Supplementary Materials: How Do Dietary Choices Influence the Energy-System Cost of Stabilizing the Climate?

David Bryngelsson, Fredrik Hedenus, Daniel J. A. Johansson, Christian Azar and Stefan Wirsenius

## 1. Method

### 1.1. Dietary Scenarios

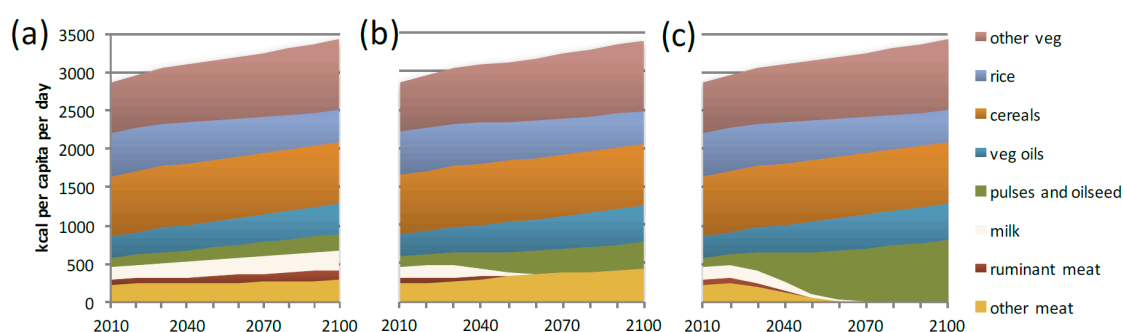

**Figure S1.** Global average consumption for (a) *Reference*, (b) *Climate Carnivore*, and (c) *Vegan* diets, expressed in kcal per capita per day.

### 1.2. Discount Rate

The choice of discount rate is value laden and there is no generally accepted value. We use a 5% discount rate for this study to be usable in comparisons with the literature, such as IPCC (p. 449, [1]). Actual investment decisions tend to be made based on discount rates at (more or less) that level.

Postponement of action as the main mechanisms for cost savings for the alternative diets makes the results very dependent on the choice of discount rate. A high discount rate values future payments less than a low discount rate. This means that the cost-saving effect of a low-emission diet is stronger the higher the discount rate, while a low discount rate reduces the benefits from an alternative diet, assuming that the climate goal is within reach without changing the diet. The decarbonization of the energy system eventually needs to be paid for if any climate goal is to be met and the value of postponing such a payment is higher for higher discount rates. With a hypothetical discount rate of 0 there is no financial gain in postponing the payments.

### 1.3. Data Tables

The same regions were used as in [2]; however, we merged Western and Eastern Europe to one region EUR. The regions are Sub-Saharan Africa (AFR), Centrally planned Asia (CPA), Europe (EUR), Former Soviet Union (FSU), Latin America & the Caribbean (LAM), Middle East and North Africa (MEA), North America (NAM), Pacific OECD (PAO), South Asia (SAS), and Pacific Asia (PAS).

We assume a linear convergence towards an assumed maximal feed efficiency. As feed-efficiency development has stalled in Sub-Saharan Africa, South Asia and Pacific Asia in the last 40 years, they are not assumed to reach the maximal feed-efficiency by 2100, see Table S1.

**Table S1.** Feed-efficiency for different kinds of animal food products over time. Numbers are expressed as MJ gross energy in feed/MJ metabolizable energy in edible product.

| Region | Product                   | 2000 | 2050 | 2100 |
|--------|---------------------------|------|------|------|
| AFR    | Ruminant meat (non-dairy) | 237  | 169  | 101  |
|        | Pork and poultry meat     | 16   | 11   | 6    |
|        | Whole milk                | 47   | 37   | 27   |
|        | Dairy bulls meat          | 100  | 71   | 43   |
| CPA    | Ruminant meat (non-dairy) | 99   | 75   | 51   |
|        | Pork and poultry meat     | 11   | 8    | 6    |
|        | Whole milk                | 11   | 8    | 5    |
|        | Dairy bulls meat          | 54   | 37   | 20   |
| EUR    | Ruminant meat (non-dairy) | 60   | 55   | 51   |
|        | Pork and poultry meat     | 7    | 7    | 6    |
|        | Whole milk                | 8    | 7    | 5    |
|        | Dairy bulls meat          | 23   | 21   | 20   |
| FSU    | Ruminant meat (non-dairy) | 65   | 58   | 51   |
|        | Pork and poultry meat     | 9    | 8    | 6    |
|        | Whole milk                | 12   | 9    | 5    |
|        | Dairy bulls meat          | 25   | 22   | 20   |
| LAM    | Cereals                   | 0    | 0    | 0    |
|        | Ruminant meat (non-dairy) | 155  | 106  | 56   |
|        | Pork and poultry meat     | 13   | 10   | 6    |
|        | Whole milk                | 20   | 14   | 8    |
| MEA    | Dairy bulls meat          | 77   | 52   | 28   |
|        | Ruminant meat (non-dairy) | 161  | 106  | 51   |
|        | Pork and poultry meat     | 10   | 8    | 6    |
|        | Whole milk                | 20   | 13   | 5    |
| NAM    | Dairy bulls meat          | 52   | 36   | 20   |
|        | Ruminant meat (non-dairy) | 60   | 55   | 51   |
|        | Pork and poultry meat     | 7    | 7    | 6    |
|        | Whole milk                | 7    | 6    | 5    |
| PAO    | Dairy bulls meat          | 25   | 22   | 20   |
|        | Ruminant meat (non-dairy) | 73   | 62   | 51   |
|        | Pork and poultry meat     | 7    | 7    | 6    |
|        | Whole milk                | 9    | 7    | 5    |
| PAS    | Dairy bulls meat          | 30   | 25   | 20   |
|        | Ruminant meat (non-dairy) | 148  | 99   | 51   |
|        | Pork and poultry meat     | 11   | 8    | 6    |
|        | Whole milk                | 18   | 12   | 5    |
| SAS    | Dairy bulls meat          | 81   | 54   | 27   |
|        | Ruminant meat (non-dairy) | 440  | 277  | 115  |
|        | Pork and poultry meat     | 14   | 10   | 6    |
|        | Whole milk                | 23   | 15   | 7    |
|        | Dairy bulls meat          | 198  | 125  | 52   |

Based on data in [3], we fit a relationship for dairy, dairy bulls and beef between the rations and feed efficiency. We find that feed rations of cereals, protein fodder and forages depend on feed efficiency,  $E$ , as  $A \times E^{-a}$ , whereas residues go as  $b \times \ln(E) + B$ . We use the same  $a$  and  $b$  for all regions but adjust  $A$  and  $B$  for each region to fit the present feed ratio. Thereby take in to consideration the overall changes in feed ratios due to increased feed-efficiency but also differences in regional endowments. What is not covered by the other feedstuffs is covered from pasture. We further assume some upper limits. For instance, no more than 45% of the feed in the dairy sector can originate from cereals. The data used can be found in Tables S2–S4.

Table S2. Feed rations in 2000.

| Region | Product                   | Cereals | Protein | Forages | Residues | Pasture |
|--------|---------------------------|---------|---------|---------|----------|---------|
| AFR    | Ruminant meat (non-dairy) | 0%      | -       | -       | 30%      | 70%     |
|        | Pork and poultry meat     | 40%     | 5%      | -       | 55%      | 0%      |
|        | Whole milk                | 0%      | -       | -       | 22%      | 78%     |
|        | Dairy bulls meat          | 0%      | -       | -       | 44%      | 56%     |
| CPA    | Ruminant meat (non-dairy) | 0%      | -       | -       | 31%      | 69%     |
|        | Pork and poultry meat     | 55%     | 15%     | -       | 30%      | 0%      |
|        | Whole milk                | 0%      | -       | -       | 27%      | 73%     |
|        | Dairy bulls meat          | 0%      | -       | -       | 33%      | 67%     |
| EUR    | Ruminant meat (non-dairy) | 7%      | -       | 43%     | 9%       | 41%     |
|        | Pork and poultry meat     | 70%     | 25%     | -       | 5%       | 0%      |
|        | Whole milk                | 12%     | 10%     | 70%     | 3%       | 5%      |
|        | Dairy bulls meat          | 12%     | -       | 65%     | 7%       | 16%     |
| FSU    | Ruminant meat (non-dairy) | 14%     | -       | 32%     | 8%       | 46%     |
|        | Pork and poultry meat     | 70%     | 25%     | -       | 5%       | 0%      |
|        | Whole milk                | 15%     | 3%      | 30%     | 8%       | 45%     |
|        | Dairy bulls meat          | 15%     | -       | 40%     | 6%       | 39%     |
| LAM    | Ruminant meat (non-dairy) | 2%      | -       | 5%      | 20%      | 73%     |
|        | Pork and poultry meat     | 50%     | 15%     | -       | 35%      | 0%      |
|        | Whole milk                | 8%      | -       | -       | 12%      | 80%     |
|        | Dairy bulls meat          | 3%      | -       | 8%      | 18%      | 72%     |
| MEA    | Ruminant meat (non-dairy) | 2%      | -       | 5%      | 34%      | 59%     |
|        | Pork and poultry meat     | 60%     | 20%     | -       | 20%      | 0%      |
|        | Whole milk                | 8%      | -       | 5%      | 32%      | 56%     |
|        | Dairy bulls meat          | 9%      | -       | 8%      | 40%      | 44%     |
| NAM    | Ruminant meat (non-dairy) | 19%     | -       | 33%     | 4%       | 44%     |
|        | Pork and poultry meat     | 70%     | 25%     | -       | 5%       | 0%      |
|        | Whole milk                | 25%     | 10%     | 60%     | 5%       | 0%      |
|        | Dairy bulls meat          | 37%     | -       | 37%     | 3%       | 23%     |
| PAO    | Ruminant meat (non-dairy) | 8%      | -       | 30%     | 12%      | 50%     |
|        | Pork and poultry meat     | 70%     | 25%     | -       | 5%       | 0%      |
|        | Whole milk                | 25%     | 6%      | 45%     | 4%       | 20%     |
|        | Dairy bulls meat          | 10%     | -       | 27%     | 13%      | 50%     |
| PAS    | Ruminant meat (non-dairy) | 0%      | -       | 4%      | 31%      | 65%     |
|        | Pork and poultry meat     | 60%     | 15%     | 0%      | 25%      | 0%      |
|        | Whole milk                | 3%      | 1%      | 20%     | 37%      | 40%     |
|        | Dairy bulls meat          | 0%      | -       | 10%     | 33%      | 57%     |
| SAS    | Ruminant meat (non-dairy) | 0%      | -       | -       | 56%      | 44%     |
|        | Pork and poultry meat     | 45%     | 8%      | -       | 48%      | 0%      |
|        | Whole milk                | 0%      | -       | 17%     | 34%      | 49%     |
|        | Dairy bulls meat          | 0%      | -       | 8%      | 48%      | 45%     |

Table S3. Feed rations in 2050.

| Region | Product                   | Cereals | Protein | Forages | Residues | Pasture |
|--------|---------------------------|---------|---------|---------|----------|---------|
| AFR    | Ruminant meat (non-dairy) | 1%      | -       | 1%      | 24%      | 73%     |
|        | Pork and poultry meat     | 52%     | 13%     | -       | 35%      | 0%      |
|        | Whole milk                | 1%      | 1%      | 5%      | 19%      | 74%     |
|        | Dairy bulls meat          | 1%      | -       | 1%      | 39%      | 59%     |
| CPA    | Ruminant meat (non-dairy) | 1%      | -       | 10%     | 27%      | 62%     |
|        | Pork and poultry meat     | 61%     | 19%     | -       | 20%      | 0%      |
|        | Whole milk                | 1%      | 1%      | 21%     | 24%      | 53%     |
|        | Dairy bulls meat          | 1%      | -       | 21%     | 27%      | 51%     |
| EUR    | Ruminant meat (non-dairy) | 9%      | -       | 42%     | 8%       | 41%     |
|        | Pork and poultry meat     | 70%     | 25%     | -       | 5%       | 0%      |
|        | Whole milk                | 19%     | 14%     | 43%     | 1%       | 23%     |
|        | Dairy bulls meat          | 14%     | -       | 50%     | 6%       | 30%     |
| FSU    | Ruminant meat (non-dairy) | 16%     | -       | 42%     | 6%       | 36%     |
|        | Pork and poultry meat     | 70%     | 25%     | -       | 5%       | 0%      |
|        | Whole milk                | 32%     | 5%      | 37%     | 4%       | 22%     |
|        | Dairy bulls meat          | 15%     | -       | 49%     | 4%       | 31%     |
| LAM    | Ruminant meat (non-dairy) | 6%      | -       | 16%     | 14%      | 64%     |
|        | Pork and poultry meat     | 58%     | 19%     | -       | 23%      | 0%      |
|        | Whole milk                | 20%     | 1%      | 5%      | 8%       | 66%     |
|        | Dairy bulls meat          | 7%      | -       | 16%     | 12%      | 65%     |
| MEA    | Ruminant meat (non-dairy) | 6%      | -       | 19%     | 27%      | 47%     |
|        | Pork and poultry meat     | 64%     | 22%     | -       | 14%      | 0%      |
|        | Whole milk                | 22%     | 1%      | 11%     | 26%      | 39%     |
|        | Dairy bulls meat          | 15%     | -       | 16%     | 35%      | 35%     |
| NAM    | Ruminant meat (non-dairy) | 16%     | -       | 42%     | 3%       | 39%     |
|        | Pork and poultry meat     | 70%     | 25%     | -       | 5%       | 0%      |
|        | Whole milk                | 33%     | 13%     | 43%     | 4%       | 8%      |
|        | Dairy bulls meat          | 35%     | -       | 46%     | 1%       | 18%     |
| PAO    | Ruminant meat (non-dairy) | 12%     | -       | 42%     | 9%       | 37%     |
|        | Pork and poultry meat     | 70%     | 25%     | -       | 5%       | 0%      |
|        | Whole milk                | 35%     | 10%     | 45%     | 1%       | 9%      |
|        | Dairy bulls meat          | 15%     | -       | 39%     | 10%      | 36%     |
| PAS    | Ruminant meat (non-dairy) | 1%      | -       | 15%     | 25%      | 60%     |
|        | Pork and poultry meat     | 64%     | 19%     | -       | 17%      | 0%      |
|        | Whole milk                | 8%      | 2%      | 27%     | 32%      | 31%     |
|        | Dairy bulls meat          | 1%      | -       | 22%     | 27%      | 50%     |
| SAS    | Ruminant meat (non-dairy) | 1%      | -       | 2%      | 49%      | 48%     |
|        | Pork and poultry meat     | 55%     | 15%     | -       | 31%      | 0%      |
|        | Whole milk                | 1%      | 1%      | 24%     | 29%      | 45%     |
|        | Dairy bulls meat          | 1%      | -       | 18%     | 41%      | 40%     |

**Table S4.** Feed rations in 2100.

| Region | Product                   | Cereals | Protein | Forages | Residues | Pasture |
|--------|---------------------------|---------|---------|---------|----------|---------|
| AFR    | Ruminant meat (non-dairy) | 5%      | -       | 6%      | 15%      | 74%     |
|        | Pork and poultry meat     | 67%     | 23%     | -       | 10%      | 0%      |
|        | Whole milk                | 2%      | 2%      | 6%      | 15%      | 76%     |
|        | Dairy bulls meat          | 3%      | -       | 2%      | 30%      | 65%     |
| CPA    | Ruminant meat (non-dairy) | 2%      | -       | 32%     | 19%      | 46%     |
|        | Pork and poultry meat     | 69%     | 24%     | -       | 8%       | 0%      |
|        | Whole milk                | 3%      | 2%      | 22%     | 18%      | 54%     |
|        | Dairy bulls meat          | 4%      | -       | 50%     | 17%      | 29%     |
| EUR    | Ruminant meat (non-dairy) | 11%     | -       | 42%     | 6%       | 41%     |
|        | Pork and poultry meat     | 70%     | 25%     | 0%      | 5%       | 0%      |
|        | Whole milk                | 34%     | 23%     | 43%     | -        | 0%      |
|        | Dairy bulls meat          | 15%     | -       | 50%     | 5%       | 30%     |
| FSU    | Ruminant meat (non-dairy) | 16%     | -       | 42%     | 3%       | 39%     |
|        | Pork and poultry meat     | 70%     | 25%     | 0%      | 5%       | 0%      |
|        | Whole milk                | 45%     | 15%     | 40%     | -        | -       |
|        | Dairy bulls meat          | 15%     | -       | 50%     | 2%       | 33%     |
| LAM    | Ruminant meat (non-dairy) | 16%     | -       | 42%     | 2%       | 40%     |
|        | Pork and poultry meat     | 68%     | 24%     | 0%      | 8%       | 0%      |
|        | Whole milk                | 45%     | 3%      | 6%      | -        | 46%     |
|        | Dairy bulls meat          | 15%     | -       | 50%     | 1%       | 34%     |
| MEA    | Ruminant meat (non-dairy) | 16%     | -       | 42%     | 14%      | 28%     |
|        | Pork and poultry meat     | 69%     | 25%     | -       | 7%       | 0%      |
|        | Whole milk                | 45%     | 6%      | 12%     | 16%      | 21%     |
|        | Dairy bulls meat          | 15%     | -       | 46%     | 24%      | 14%     |
| NAM    | Ruminant meat (non-dairy) | 16%     | -       | 42%     | 1%       | 41%     |
|        | Pork and poultry meat     | 70%     | 25%     | -       | 5%       | 0%      |
|        | Whole milk                | 35%     | 17%     | 43%     | 2%       | 3%      |
|        | Dairy bulls meat          | 35%     | -       | 50%     | -        | 15%     |
| PAO    | Ruminant meat (non-dairy) | 16%     | -       | 42%     | 5%       | 37%     |
|        | Pork and poultry meat     | 70%     | 25%     | -       | 5%       | 0%      |
|        | Whole milk                | 35%     | 19%     | 45%     | -        | 1%      |
|        | Dairy bulls meat          | 26%     | -       | 50%     | 6%       | 18%     |
| PAS    | Ruminant meat (non-dairy) | 6%      | -       | 42%     | 12%      | 40%     |
|        | Pork and poultry meat     | 69%     | 24%     | -       | 7%       | 0%      |
|        | Whole milk                | 37%     | 11%     | 31%     | 22%      | 0%      |
|        | Dairy bulls meat          | 4%      | -       | 50%     | 16%      | 30%     |
| SAS    | Ruminant meat (non-dairy) | 11%     | -       | 28%     | 33%      | 28%     |
|        | Pork and poultry meat     | 68%     | 23%     | -       | 9%       | 0%      |
|        | Whole milk                | 10%     | 6%      | 27%     | 19%      | 38%     |
|        | Dairy bulls meat          | 7%      | -       | 50%     | 27%      | 16%     |

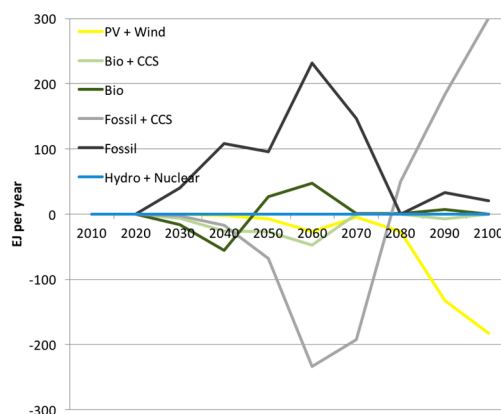**Figure S2.** The differences in energy system development between the *Vegan* and *Reference* scenarios.

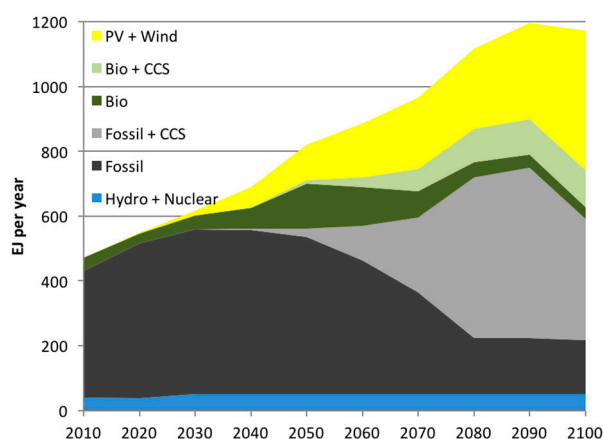

**Figure S3.** Global primary energy supply in EJ/year for staying below the 2 °C limit with the *Vegan* diet and 150 EJ/year bioenergy potential.

## References

1. Clarke, L.; Jiang, K.; Akimoto, K.; Babiker, M.; Blanford, G.; Fisher-Vanden, K.; Hourcade, J.-C.; Krey, V.; Kriegler, E.; Lo'schel, A.; et al. Assessing transformation pathways. In *Climate Change 2014: Mitigation of Climate Change*; Edenhofer, O., Pichs-Madruga, R., Sokona, Y., Farahani, E., Kadner, S., Seyboth, K., Adler, A., Baum, I., Brunner, S., Eickemeier, P., et al., Eds.; Cambridge University Press: Cambridge, UK; New York, NY, USA, 2013.
2. International Institute for Applied Systems Analysis. GGI Scenario Database, 2nd ed. Available online: <http://www.iiasa.ac.at/web-apps/ggi/GgiDb/dsd?Action=htmlpage&page=regions> (accessed on 28 November 2014)
3. Hedenus, F.; Wirsenius, S.; Johansson, D.J.A. The importance of reduced meat and dairy consumption for meeting stringent climate change targets. *Clim. Chang.* **2014**, *124*, 79–91.
